# Supplementary material for: Associations of circulating plasma microRNAs with age, body mass index and sex in a population-based study
Source: PubMed Central journal article supplement (PMC4604724; doi:10.1186/s12920-015-0136-7), 2015-10-14
Supplement: 12920_2015_136_MOESM1_ESM.pdf [file 12920_2015_136_MOESM1_ESM.pdf]

Additional file 1: Table S1 Blood cell parameters.

| Blood cell parameter                                       | overall           |                 |                     |                  |                  |                | male              |                 |                | female            |                 |                | p(Sex)          |
|------------------------------------------------------------|-------------------|-----------------|---------------------|------------------|------------------|----------------|-------------------|-----------------|----------------|-------------------|-----------------|----------------|-----------------|
|                                                            | Mean <sub>o</sub> | SD <sub>o</sub> | Median <sub>o</sub> | Min <sub>o</sub> | Max <sub>o</sub> | N <sub>o</sub> | Mean <sub>m</sub> | SD <sub>m</sub> | N <sub>m</sub> | Mean <sub>f</sub> | SD <sub>f</sub> | N <sub>f</sub> |                 |
| Basophiles [%]                                             | 0.49              | 0.30            | 0.40                | 0.00             | 1.90             | 370            | 0.50              | 0.31            | 186            | 0.48              | 0.29            | 184            | 7.39E-01        |
| <b>Eosinophils [%]</b>                                     | 2.65              | 1.91            | 2.20                | 0.10             | 14.10            | 370            | 2.94              | 1.93            | 186            | 2.36              | 1.86            | 184            | <b>3.35E-03</b> |
| <b>Haematocrit</b>                                         | 0.42              | 0.03            | 0.42                | 0.28             | 0.52             | 370            | 0.43              | 0.03            | 186            | 0.40              | 0.03            | 184            | <b>5.92E-30</b> |
| <b>Haemoglobin [mmol/l]</b>                                | 8.60              | 0.76            | 8.60                | 5.00             | 10.70            | 370            | 9.05              | 0.61            | 186            | 8.15              | 0.62            | 184            | <b>2.46E-36</b> |
| Lymphocytes [%]                                            | 30.16             | 7.34            | 29.90               | 11.70            | 50.00            | 370            | 29.83             | 6.85            | 186            | 30.48             | 7.81            | 184            | 3.94E-01        |
| <b>Monocytes [%]</b>                                       | 9.20              | 2.19            | 9.10                | 4.30             | 16.80            | 370            | 9.74              | 2.27            | 186            | 8.65              | 1.96            | 184            | <b>1.10E-06</b> |
| Neutrophils [%]                                            | 57.33             | 8.31            | 56.95               | 31.70            | 78.70            | 370            | 56.82             | 7.78            | 186            | 57.85             | 8.80            | 184            | 2.37E-01        |
| <b>Platelets [Gpt/l]</b>                                   | 226.80            | 48.93           | 220.00              | 102.00           | 390.00           | 370            | 213.53            | 43.72           | 186            | 240.21            | 50.36           | 184            | <b>9.96E-08</b> |
| <b>Erythrocytes [Tpt/l]</b>                                | 4.65              | 0.39            | 4.60                | 3.50             | 5.70             | 370            | 4.85              | 0.34            | 186            | 4.46              | 0.32            | 184            | <b>1.21E-25</b> |
| Leukocytes [Gpt/l]                                         | 5.71              | 1.48            | 5.43                | 2.80             | 11.60            | 370            | 5.64              | 1.48            | 186            | 5.79              | 1.47            | 184            | 3.45E-01        |
| Mean corpuscular volume [fl]                               | 174.03            | 43.63           | 174.00              | 21.00            | 282.00           | 372            | 171.65            | 46.05           | 187            | 176.43            | 41.02           | 185            | 2.90E-01        |
| <b>Mean corpuscular haemoglobin [fmol]</b>                 | 50.42             | 10.96           | 50.50               | 2.00             | 95.00            | 372            | 52.54             | 10.84           | 187            | 48.27             | 10.69           | 185            | <b>1.54E-04</b> |
| <b>Mean corpuscular haemoglobin concentration [mmol/l]</b> | 28.65             | 6.05            | 28.00               | 2.00             | 54.00            | 372            | 30.92             | 5.75            | 187            | 26.35             | 5.47            | 185            | <b>4.55E-14</b> |
| Red blood cell distribution width [%]                      | 20.66             | 9.89            | 19.00               | 5.00             | 80.00            | 372            | 19.72             | 9.34            | 187            | 21.60             | 10.36           | 185            | 6.72E-02        |
| Mean platelet volume [fl]                                  | 32.29             | 30.66           | 14.00               | 1.00             | 79.00            | 372            | 35.25             | 31.51           | 187            | 29.30             | 29.56           | 185            | 6.12E-02        |

SD –standard deviation, N – observations, o-overall, m-male, f-female, p(Sex) – p-value from two-sided t-test for difference of means between sexes

Additional file 1: Figure S1 Q-values of BCPs in the linear regression model.

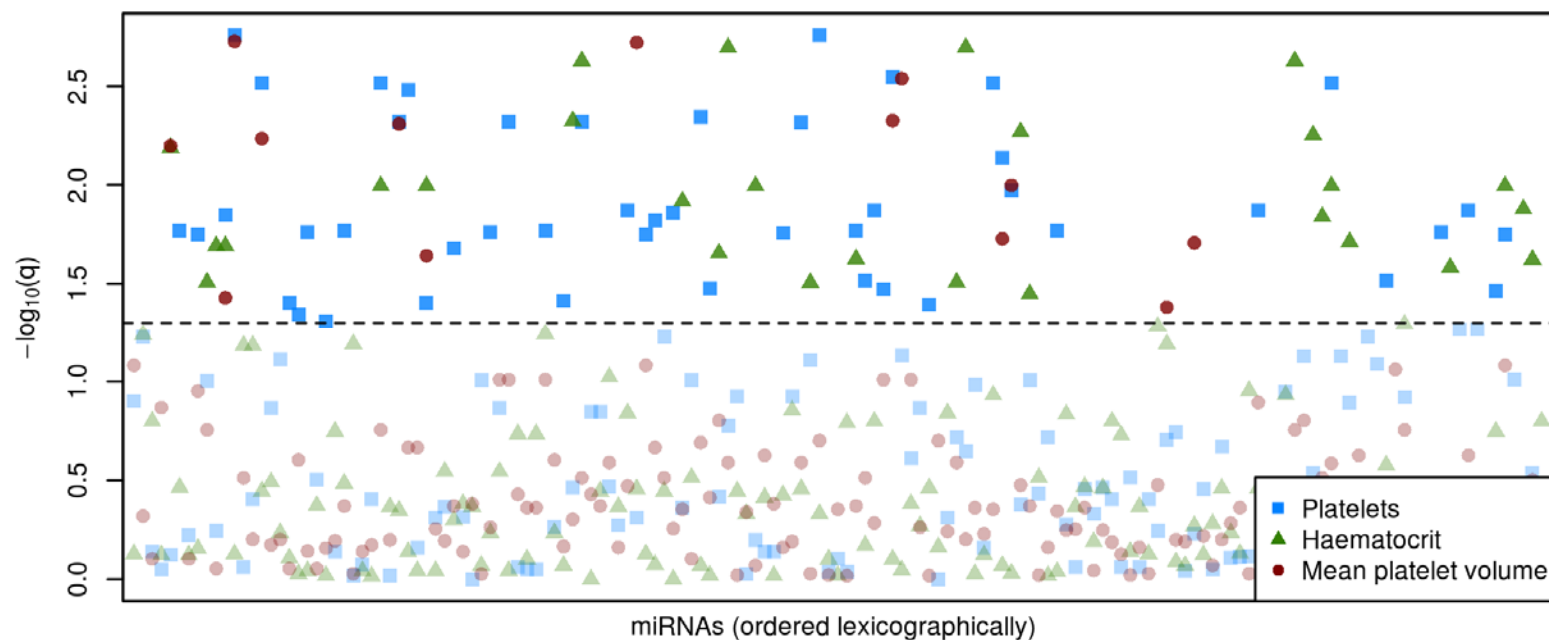

**Figure S1: Association  $q$ -values of BCPs in the linear regression model.** The  $-\log_{10}(q)$  values of BCPs in the linear regression analysis of miRNA levels and phenotypes. Blue rectangles represent Platelets, green triangles haematocrit, and red circles mean platelet volumes.  $Q$ -values were obtained via Benjamini-Hochberg (BH) multiple testing correction of raw  $p$ -values. The dotted line marks the significance threshold of  $q = 0.05$ . Plasma miRNAs are lexicographically arranged on the x-axis (though not labelled individually).
