# Supplementary material for: Associations of circulating plasma microRNAs with age, body mass index and sex in a population-based study
Source: PubMed Central journal article supplement (PMC4604724; doi:10.1186/s12920-015-0136-7), 2015-10-14
Supplement: 12920_2015_136_MOESM2_ESM.pdf [file 12920_2015_136_MOESM2_ESM.pdf]

Additional file 2: Table S2. Significantly Age-associated miRNAs in different models.

| miRNA           | Age: adj BMI + sex (7) |          | Age: adj BMI + sex + BCPs (12) |          | N   | Accession | gene family | MIPF gene family | Chromo-some | strand |
|-----------------|------------------------|----------|--------------------------------|----------|-----|-----------|-------------|------------------|-------------|--------|
|                 | $\beta_{\Delta Ct}$    | <i>q</i> | $\beta_{\Delta Ct}$            | <i>q</i> |     |           |             |                  |             |        |
| hsa-let-7a-5p   | -0.01                  | 2.43E-02 | -0.01                          | 8.63E-03 | 370 | MI0000060 | let-7       | MIPF0000002      | chr9        | +      |
| hsa-miR-101-3p  |                        |          | 0.01                           | 1.97E-02 | 370 | MI0000103 | mir-101     | MIPF0000046      | chr1        | -      |
| hsa-miR-126-3p  | -0.01                  | 1.93E-07 | -0.01                          | 9.70E-09 | 366 | MI0000471 | mir-126     | MIPF0000115      | chr9        | +      |
| hsa-miR-142-3p  | -0.01                  | 8.10E-03 | -0.01                          | 5.03E-04 | 369 | MI0000458 | mir-142     | MIPF0000084      | chr17       | -      |
| hsa-miR-21-5p   | -0.01                  | 6.46E-04 | 0.00                           | 2.90E-03 | 366 | MI0000077 | mir-21      | MIPF0000060      | chr17       | +      |
| hsa-miR-25-3p   |                        |          | 0.01                           | 1.97E-02 | 370 | MI0000082 | mir-25      | MIPF0000013      | chr7        | -      |
| hsa-miR-26a-5p  |                        |          | -0.01                          | 9.20E-03 | 369 | MI0000083 | mir-26      | MIPF0000043      | chr3        | +      |
| hsa-miR-30b-5p  | -0.01                  | 2.43E-02 | -0.01                          | 2.90E-03 | 367 | MI0000441 | mir-30      | MIPF0000005      | chr8        | -      |
| hsa-miR-30c-5p  | -0.01                  | 1.33E-03 | -0.01                          | 1.13E-04 | 368 | MI0000254 | mir-30      | MIPF0000005      | chr6        | -      |
| hsa-miR-93-5p   | 0.01                   | 1.89E-02 | 0.01                           | 1.34E-02 | 367 | MI0000095 | mir-17      | MIPF0000001      | chr7        | -      |
| hsa-miR-151a-5p |                        |          | -0.01                          | 4.05E-02 | 367 | MI0000809 | mir-28      | MIPF0000057      | chr8        | -      |
| hsa-miR-23b-3p  |                        |          | -0.01                          | 2.71E-02 | 368 | MI0000439 | mir-23      | MIPF0000027      | chr9        | +      |

Age-associated miRNAs in different linear regression models. Age: adj BMI + sex is adjusted for BMI and sex, Age: adj BMI + sex + BCPs is additionally adjusted for BCPs.

$\beta_{\Delta Ct}$  : effect size, calculated on  $\Delta Ct$  values, (small  $\Delta Ct$  values indicate high miRNA levels),  $\beta_{\Delta Ct} < 0$ , positive association, implies higher miRNA levels with increasing age,

$\beta_{\Delta Ct} > 0$  – negative association, indicate smaller miRNA levels with increasing age. *q*: corrected *p*-value using Benjamini-Hochberg multiple test correction. Accession number and additional information (gene family, MIPF gene family number, location on chromosome, strand) were derived from miRBase 21 ([www.mirbase.org](http://www.mirbase.org)).
