# Supplementary material for: Associations of circulating plasma microRNAs with age, body mass index and sex in a population-based study
Source: PubMed Central journal article supplement (PMC4604724; doi:10.1186/s12920-015-0136-7), 2015-10-14
Supplement: 12920_2015_136_MOESM3_ESM.pdf [file 12920_2015_136_MOESM3_ESM.pdf]

Additional file 3: Table S3. Significantly BMI-associated miRNAs in different models.

| miRNA           | BMI: adj age + sex (15) |          | BMI: adj age + sex + BCPs (19) |          | N   | Accession | gene family | MIPF gene family | Chromo-some | strand |
|-----------------|-------------------------|----------|--------------------------------|----------|-----|-----------|-------------|------------------|-------------|--------|
|                 | $\beta_{\Delta Ct}$     | $q$      | $\beta_{\Delta Ct}$            | $q$      |     |           |             |                  |             |        |
| hsa-miR-106a-5p | 0.02                    | 1.99E-02 | 0.02                           | 5.82E-03 | 366 | MI0000113 | mir-17      | MIPF0000001      | chrX        | -      |
| hsa-miR-122-5p  | -0.08                   | 2.61E-05 | -0.08                          | 2.25E-05 | 369 | MI0000442 | mir-122     | MIPF0000095      | chr18       | +      |
| hsa-miR-143-3p  | 0.04                    | 2.61E-03 | 0.04                           | 2.82E-03 | 314 | MI0000459 | mir-143     | MIPF0000094      | chr5        | +      |
| hsa-miR-145-5p  | 0.03                    | 4.72E-03 | 0.03                           | 1.13E-02 | 342 | MI0000461 | mir-145     | MIPF0000079      | chr5        | +      |
| hsa-miR-148a-3p | -0.04                   | 2.61E-05 | -0.04                          | 2.25E-05 | 368 | MI0000253 | mir-148     | MIPF0000056      | chr7        | -      |
| hsa-miR-185-5p  | 0.02                    | 1.32E-02 | 0.03                           | 5.82E-03 | 370 | MI0000482 | mir-185     | MIPF0000202      | chr22       | +      |
| hsa-miR-193b-3p | -0.05                   | 1.99E-02 | -0.05                          | 6.21E-03 | 208 | MI0003137 | mir-193     | MIPF0000082      | chr16       | +      |
| hsa-miR-194-5p  | -0.03                   | 4.72E-03 | -0.04                          | 1.68E-03 | 362 | MI0000488 | mir-194     | MIPF0000055      | chr1        | -      |
| hsa-miR-19b-3p  |                         |          | 0.01                           | 2.76E-02 | 368 | MI0000074 | mir-19      | MIPF0000011      | chr13       | +      |
| hsa-miR-20a-5p  | 0.02                    | 3.16E-02 | 0.02                           | 8.05E-03 | 367 | MI0000076 | mir-17      | MIPF0000001      | chr13       | +      |
| hsa-miR-215     | -0.03                   | 1.99E-02 | -0.03                          | 3.50E-02 | 363 | MI0000291 | mir-192     | MIPF0000063      | chr1        | -      |
| hsa-miR-365a-3p | -0.05                   | 2.61E-03 | -0.06                          | 1.63E-03 | 258 | MI0000767 | mir-365     | MIPF0000061      | chr16       | +      |
| hsa-miR-486-5p  |                         |          | 0.02                           | 3.44E-02 | 368 | MI0002470 | mir-486     | MIPF0000220      | chr8        | -      |
| hsa-miR-505-3p  | -0.05                   | 1.02E-04 | -0.06                          | 3.62E-05 | 309 | MI0003190 | mir-505     | MIPF0000217      | chrX        | -      |
| hsa-miR-885-5p  | -0.05                   | 1.99E-02 | -0.05                          | 5.82E-03 | 315 | MI0005560 | mir-885     | MIPF0000532      | chr3        | -      |
| hsa-miR-93-5p   | 0.02                    | 1.10E-02 | 0.02                           | 3.21E-03 | 367 | MI0000095 | mir-17      | MIPF0000001      | chr7        | -      |
| hsa-miR-99a-5p  | -0.04                   | 3.24E-03 | -0.04                          | 2.63E-04 | 355 | MI0000101 | mir-10      | MIPF0000033      | chr21       | +      |
| hsa-miR-18a-5p  |                         |          | 0.03                           | 3.44E-02 | 351 | MI0000072 | mir-18      | MIPF0000001      | chr13       | +      |
| hsa-let-7i-5p   |                         |          | 0.02                           | 4.73E-02 | 367 | MI0000434 | let-7       | MIPF0000002      | chr12       | +      |

BMI-associated miRNAs in different linear regression models. BMI: adj age + sex is adjusted for age and sex, BMI: adj age + sex + BCPs is additionally adjusted for BCPs.

$\beta_{\Delta Ct}$  : effect size, calculated on  $\Delta Ct$  values, (small  $\Delta Ct$  values indicate high miRNA levels),  $\beta_{\Delta Ct} < 0$ , positive association, implies higher miRNA levels with increasing BMI,

$\beta_{\Delta Ct} > 0$  – negative association, indicate smaller miRNA levels with increasing BMI.  $q$ : corrected  $p$ -value using Benjamini-Hochberg multiple test correction. Accession number and additional information (gene family, MIPF gene family number, location on chromosome, strand) were derived from miRBase 21 ([www.mirbase.org](http://www.mirbase.org)).
