# Supplementary material for: Associations of circulating plasma microRNAs with age, body mass index and sex in a population-based study
Source: PubMed Central journal article supplement (PMC4604724; doi:10.1186/s12920-015-0136-7), 2015-10-14
Supplement: 12920_2015_136_MOESM4_ESM.pdf [file 12920_2015_136_MOESM4_ESM.pdf]

Additional file 4: Table S4. Significantly Sex-associated miRNAs in different models.

| miRNA           | Sex: adj BMI + age (35) |          | Sex: adj BMI + age + BCPs<br>(7) |          | N   | Accession | gene<br>family | MIPF gene<br>family | Chromo-<br>some | strand | potential miRNA<br>origin                           |
|-----------------|-------------------------|----------|----------------------------------|----------|-----|-----------|----------------|---------------------|-----------------|--------|-----------------------------------------------------|
|                 | $\beta$                 | $q$      | $\beta$                          | $q$      |     |           |                |                     |                 |        |                                                     |
| hsa-miR-145-5p  | -0.39                   | 3.95E-05 | -0.35                            | 5.42E-03 | 342 | MI0000461 | mir-145        | MIPF0000079         | chr5            | +      | PBMC <sup>2</sup>                                   |
| hsa-miR-425-5p  | 0.23                    | 2.62E-05 |                                  |          | 367 | MI0001448 | mir-425        | MIPF0000242         | chr3            | -      |                                                     |
| hsa-miR-32-5p   | 0.36                    | 1.31E-04 |                                  |          | 364 | MI0000090 | mir-32         | MIPF0000069         | chr9            | -      |                                                     |
| hsa-miR-451a    | 0.31                    | 2.16E-04 |                                  |          | 368 | MI0001729 | mir-451        | MIPF0000148         | chr17           | -      | E <sup>1</sup> , H <sup>4</sup>                     |
| hsa-miR-22-3p   | 0.25                    | 2.27E-04 | 0.26                             | 5.42E-03 | 366 | MI0000078 | mir-22         | MIPF0000053         | chr17           | -      |                                                     |
| hsa-miR-16-2-3p | 0.37                    | 2.27E-04 |                                  |          | 353 | MI0000115 | mir-15         | MIPF0000006         | chr3            | +      | PBMC, H <sup>4</sup>                                |
| hsa-miR-142-3p  | -0.27                   | 2.27E-04 | -0.27                            | 5.42E-03 | 369 | MI0000458 | mir-142        | MIPF0000084         | chr17           | -      | G <sup>1</sup> , T <sup>1</sup> , PBMC <sup>1</sup> |
| hsa-miR-101-3p  | 0.19                    | 3.57E-04 |                                  |          | 370 | MI0000103 | mir-101        | MIPF0000046         | chr1            | -      |                                                     |
| hsa-miR-144-3p  | 0.28                    | 6.11E-04 |                                  |          | 369 | MI0000460 | mir-144        | MIPF0000093         | chr17           | -      |                                                     |
| hsa-miR-363-3p  | 0.26                    | 1.14E-03 |                                  |          | 368 | MI0000764 | mir-92         | MIPF0000138         | chrX            | -      |                                                     |
| hsa-miR-15a-5p  | 0.18                    | 1.14E-03 |                                  |          | 368 | MI0000069 | mir-15         | MIPF0000006         | chr13           | -      |                                                     |
| hsa-miR-19b-3p  | 0.17                    | 1.14E-03 |                                  |          | 368 | MI0000074 | mir-19         | MIPF0000011         | chr13           | +      |                                                     |
| hsa-miR-29b-3p  | 0.23                    | 1.45E-03 |                                  |          | 345 | MI0000105 | mir-29         | MIPF0000009         | chr7            | -      |                                                     |
| hsa-miR-424-5p  | 0.27                    | 2.02E-03 | 0.33                             | 5.42E-03 | 362 | MI0001446 | mir-322        | MIPF0000164         | chrX            | -      | MD <sup>3</sup>                                     |
| hsa-miR-28-5p   | -0.35                   | 6.78E-03 |                                  |          | 277 | MI0000086 | mir-28         | MIPF0000057         | chr3            | +      |                                                     |
| hsa-miR-106b-5p | 0.16                    | 3.18E-03 |                                  |          | 369 | MI0000734 | mir-17         | MIPF0000001         | chr7            | -      |                                                     |
| hsa-miR-148a-3p | 0.21                    | 7.24E-03 | 0.27                             | 1.29E-02 | 368 | MI0000253 | mir-148        | MIPF0000056         | chr7            | -      |                                                     |
| hsa-miR-143-3p  | -0.28                   | 1.23E-02 |                                  |          | 314 | MI0000459 | mir-143        | MIPF0000094         | chr5            | +      | PBMC <sup>2</sup>                                   |
| hsa-miR-29c-3p  | 0.17                    | 5.84E-03 |                                  |          | 367 | MI0000735 | mir-29         | MIPF0000009         | chr1            | -      |                                                     |
| hsa-miR-25-3p   | 0.19                    | 6.78E-03 |                                  |          | 370 | MI0000082 | mir-25         | MIPF0000013         | chr7            | -      |                                                     |
| hsa-miR-19a-3p  | 0.14                    | 7.24E-03 |                                  |          | 369 | MI0000073 | mir-19         | MIPF0000011         | chr13           | +      |                                                     |
| hsa-miR-26a-5p  | -0.20                   | 1.10E-02 |                                  |          | 369 | MI0000083 | mir-26         | MIPF0000043         | chr3            | +      | G <sup>1</sup> , PBMC <sup>1</sup>                  |
| hsa-miR-150-5p  | -0.22                   | 7.29E-03 | -0.31                            | 5.42E-03 | 369 | MI0000479 | mir-150        | MIPF0000197         | chr19           | -      | PBMC, H <sup>4</sup>                                |
| hsa-miR-16-5p   | 0.16                    | 1.23E-02 |                                  |          | 369 | MI0000070 | mir-15         | MIPF0000006         | chr13           | -      |                                                     |
| hsa-miR-205-5p  | -0.44                   | 1.48E-02 |                                  |          | 135 | MI0000285 | mir-205        | MIPF0000058         | chr1            | +      |                                                     |
| hsa-miR-485-3p  | -0.24                   | 2.10E-02 |                                  |          | 342 | MI0002469 | mir-485        | MIPF0000201         | chr14           | +      |                                                     |
| hsa-let-7d-5p   | -0.22                   | 2.62E-02 |                                  |          | 358 | MI0000065 | let-7          | MIPF0000002         | chr9            | +      | T <sup>1</sup>                                      |
| hsa-miR-766-3p  | -0.28                   | 2.39E-02 |                                  |          | 240 | MI0003836 | mir-766        | MIPF0000677         | chrX            | -      |                                                     |
| hsa-miR-501-3p  | -0.30                   | 2.68E-02 |                                  |          | 216 | MI0003185 | mir-500        | MIPF0000139         | chrX            | +      |                                                     |
| hsa-miR-130a-3p | 0.19                    | 2.11E-02 |                                  |          | 367 | MI0000448 | mir-130        | MIPF0000034         | chr11           | +      |                                                     |

| miRNA           | Sex: adj BMI + age (35) |          | Sex: adj BMI + age + BCPs<br>(7) |          | N   | Accession | gene<br>family | MIPF gene<br>family | Chromo-<br>some | strand | potential miRNA<br>origin |
|-----------------|-------------------------|----------|----------------------------------|----------|-----|-----------|----------------|---------------------|-----------------|--------|---------------------------|
|                 | $\beta$                 | $q$      | $\beta$                          | $q$      |     |           |                |                     |                 |        |                           |
| hsa-miR-146b-5p | -0.27                   | 2.11E-02 |                                  |          | 138 | MI0003129 | mir-146        | MIPF0000103         | chr10           | +      |                           |
| hsa-miR-342-3p  | -0.18                   | 2.62E-02 |                                  |          | 369 | MI0000805 | mir-342        | MIPF0000190         | chr14           | +      |                           |
| hsa-let-7c      |                         |          |                                  |          | 317 | MI0000064 | let-7          | MIPF0000002         | chr21           | +      |                           |
| hsa-miR-195-5p  | -0.32                   | 3.62E-02 |                                  |          | 146 | MI0000489 | mir-15         | MIPF0000006         | chr17           | -      |                           |
| hsa-miR-301a-3p |                         |          |                                  |          | 294 | MI0000745 | mir-130        | MIPF0000034         | chr17           | -      |                           |
| hsa-miR-92a-3p  | 0.11                    | 4.92E-02 |                                  |          | 369 | MI0000093 | mir-25         | MIPF0000013         | chr13           | +      |                           |
| hsa-miR-30d-5p  | 0.18                    | 3.72E-02 | 0.33                             | 5.42E-03 | 327 | MI0000255 | mir-30         | MIPF0000005         | chr8            | -      |                           |

Sex-associated miRNAs in different linear regression models. Sex: adj BMI + age is adjusted for BMI and age, Sex: adj BMI + age + BCPs is additionally adjusted for BCPs.

$\beta_{\Delta Ct}$ : effect size, calculated on  $\Delta Ct$  values, (small  $\Delta Ct$  values indicate high miRNA levels),  $\beta_{\Delta Ct} < 0$ , positive association, implies a female specific miRNA,  $\beta_{\Delta Ct} > 0$  – negative association, indicates a male specific miRNA.  $q$ : corrected  $p$ -value using Benjamini-Hochberg multiple test correction. Accession number and additional information (gene family, MIPF gene family number, location on chromosome, strand) were derived from miRBase 21 ([www.mirbase.org](http://www.mirbase.org)).

G: granulocytes (basophils, eosinophils, neutrophils), E: erythrocytes, T: thrombocytes, PBMC: peripheral blood mononuclear cells (monocytes: macrophages, dendritic cells; lymphocytes: B-cells, T-cells, NK-cells), MD: monocyte differentiation, H: hematopoiesis;

references: <sup>1</sup> Teruel-Montoya R, Kong X, Abraham S, Ma L, Kunapuli SP, Holinstat M, et al. MicroRNA expression differences in human hematopoietic cell lineages enable regulated transgene expression. PLoS One. 2014; 9: e102259.; <sup>2</sup> Zhou J, Chaudry H, Zhong Y, Mustafa AM, Perkins LA, Owens WB, et al. Dysregulation in microRNA expression in peripheral blood mononuclear cells of sepsis patients is associated with immunopathology. Cytokine 2015; 71: 89-100.; <sup>3</sup> Dai R, Ahmed SA Sexual dimorphism of miRNA expression: a new perspective in understanding the sex bias of autoimmune diseases. Ther Clin Risk Manag. 2014; 10: 151-163.; <sup>4</sup> Zimmerman AL, Wu S MicroRNAs, cancer and cancer stem cells. Cancer Lett. 2011; 300: 10-19.
